# Supplementary material
Source: Royal Society of Chemistry journal article supplement (doi:10.1039/d6tb00281a)
Supplement: d6tb00281a1.pdf [file d6tb00281a1.pdf]

## Supplementary material

### **Bioinspired Electrospun Nanofibrous Dressings Loaded with Mentha-Derived Exosome-like Vesicles for Antibacterial and Immunomodulatory Burn Healing**

*Yuansong Liu*<sup>a</sup>, *Yingying Zhu*<sup>b</sup>, *Xinyu Gao*<sup>b</sup>, *Yuhan Miao*<sup>c</sup>, *Qianying Xie*<sup>d</sup>, *Ying Li*<sup>e</sup>,  
*Enzhe Liu*<sup>e</sup>, *Jun Ren*<sup>a, \*</sup>, *Xiansong Wang*<sup>e, \*</sup>

<sup>a</sup> College of Chemistry and Chemical Engineering, Hubei University 430062, China.

<sup>b</sup> The Third Affiliated Hospital of Henan Medical University, Institutes of Health Central Plain, Clinical Medical Center of Tissue Engineering and Regeneration, Henan Medical University, Henan 453003, China.

<sup>c</sup> School of Biomedical Engineering, Anhui Medical University, Anhui 230032, China.

<sup>d</sup> Plastic Surgery Institute, Shandong Second Medical University, Shandong 261053, P. R. China.

<sup>e</sup> Department of Plastic and Reconstructive Surgery, Shanghai Key Laboratory of Tissue Engineering, Shanghai Ninth People's Hospital, Shanghai Jiao Tong University School of Medicine, Shanghai 200011, P. R. China.

\* Corresponding author. College of Chemistry and Chemical Engineering, Hubei University 430062, China. Department of Plastic and Reconstructive Surgery, Shanghai Key Laboratory of Tissue Engineering, Shanghai Ninth People's Hospital, Shanghai Jiao Tong University School of Medicine, Shanghai 200011, P. R. China  
E-mail addresses: wonderluis@sjtu.edu.cn (X. Wang); renjun@hubu.edu.cn (J. Ren)

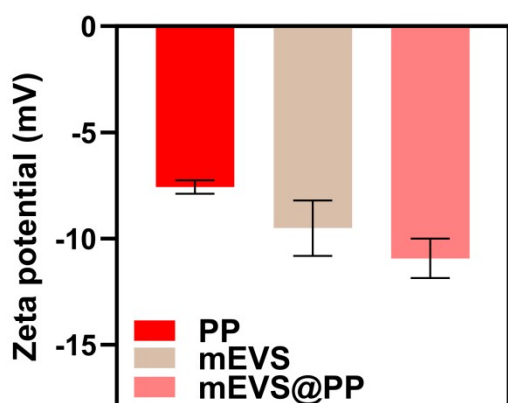

**Figure S1.** Zeta of PP、mEVs and mEVs@PP.

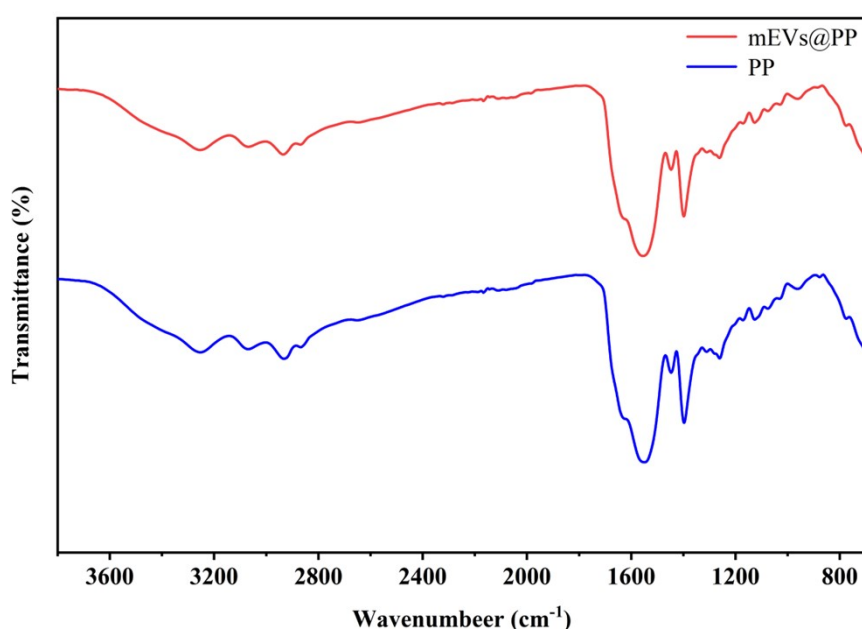

**Figure S2.** FTIR spectra of PP、mEVs@PP. PP electrospun fibers (blue curve) and mEVs@PP composite scaffolds (red curve) exhibited strong characteristic absorption peaks at  $1549.59\text{ cm}^{-1}$  and  $1397.23\text{ cm}^{-1}$ , corresponding to the I band of amide C=O stretching vibrations and the II band of amide N-H bending and C-N stretching vibrations in the polyamino acid backbone, respectively.

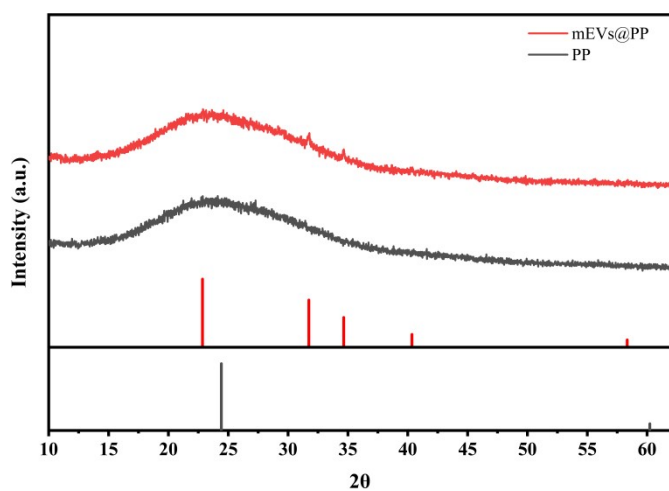

**Figure S3.** XRD of PP、mEVs@PP.

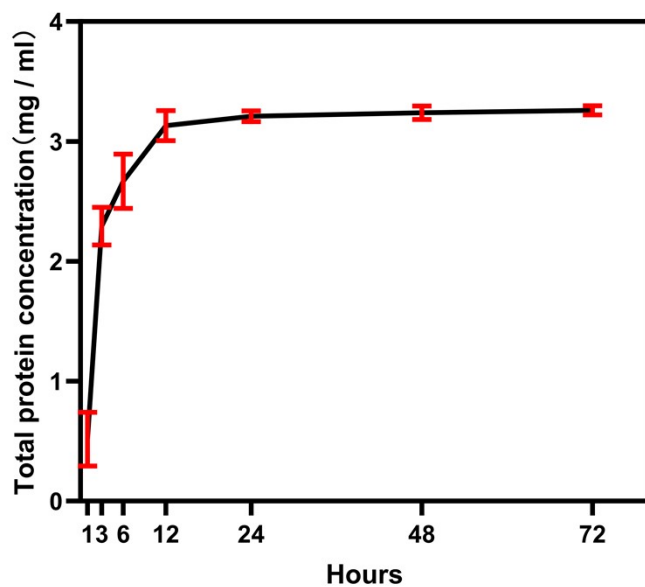

**Figure S4.** The exosome release rate of mEVs@PP. 1 g of mEVs@PP electrospun fibers were dissolved in 5 ml PBS and cultured in a shaker at 37° C and 100 rpm. Protein content in the supernatants was detected at 1, 3, 6, 12,24,48, and 72 hours using the BCA method.

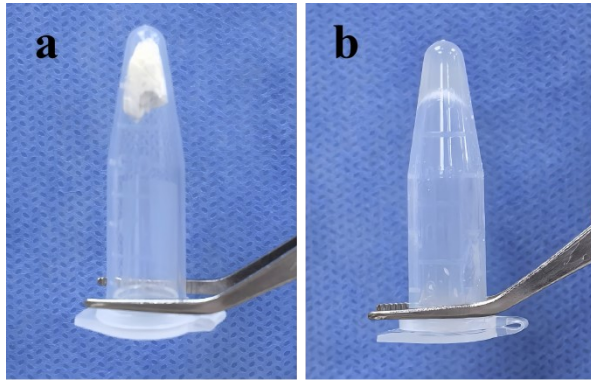

**Figure S5.** Schematic diagram of water absorption swelling capacity and strong adsorption capability of mEVs@PP electrospun. a) Dry mEVs; b) Adhesive extracellular matrix formed after water saturation.

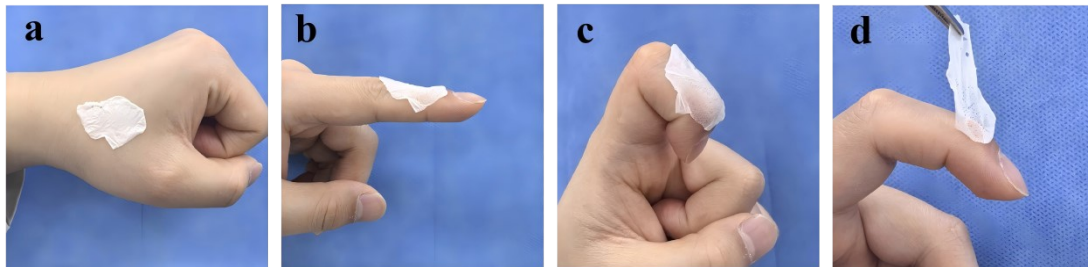

**Figure S6.** Macroscopic observation of mEVs@PP electrospun on human skin.
